# Supplementary material
Source: Research Square preprint supplement (doi:10.21203/rs.3.rs-10116077/v1)
Supplement: Supplementary file 1 [file 0170a472aefa58fbe5aa781a.pdf]

# Online Supplementary Material to: The impact of periodontal prevalence trends on the costs and prevalence of dementia in England: a modelling study

## 1 Dementia Stage Mix and Severity

Dementia in our model was characterised by four stages (1) cognitively normal, (2) mild, (3) moderate and (4) severe, before the final absorbing death state. We used this model inspired by Brück et al. (2023) as the stage breakdown provides a more accurate evaluation of costs and QALYs [1].

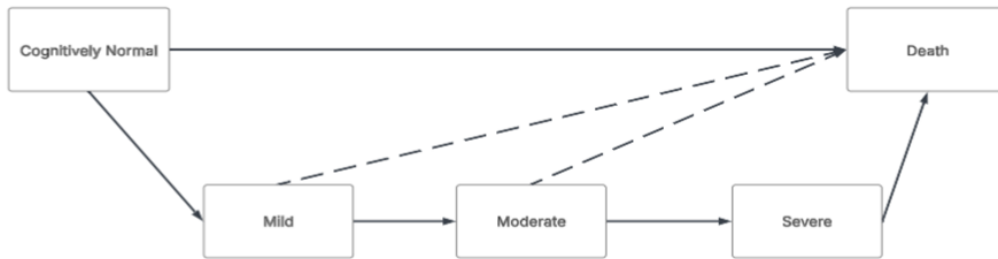

**Figure 1.A** Dementia model disease stage structure

We calculated the proportion of total individuals in each stage based of the Economic Impact Of Dementia CF Report, which gave percentages by each disease stage, support by NHS Primary Care Dementia Data [2]. Dementia prevalence by age band was then calculated through a calibration process to reflect that of 2023 and 2024. Final proportion reported here does not sum to 1 (0.99) due to rounding.

**Table 1.A** Dementia prevalence by disease stage

| Stage                       | Cognitively Normal | Mild    | Moderate | Severe  |
|-----------------------------|--------------------|---------|----------|---------|
| <b>Final Proportion (%)</b> | 90                 | 4.52376 | 3.39282  | 1.18656 |

Due to limitations in reporting data, disease severity proportions for males and females had to be assumed the same. The CF Report provides dementia prevalence by dementia severity for individuals over 65 years in the whole UK. Our model uses Office of National Statistics (ONS) population proportions to distribute individuals by age and sex accurate to our baseline English population [4]. Combined with the parametric age effects and sex-split of risk factor hazard ratios (HRs) (where possible), we believe this mitigates the potential downsides of our sex-split prevalence by stage assumptions. The baseline onset probability of dementia was estimated using incidence rates from previous UK-based

retrospective studies [5,6]. An incidence rate of 1.4% across men and women over age 50 was calculated using the English Longitudinal Study of Aging (ELSA), with another study using UK primary care electronic health records to calculate a higher incidence rate of 3%. We calibrated the model with empirical dementia incidence data for 2024 from NHS England to get 0.0025 as baseline probability, allowing the role of the age and risk factor effects to perform on incident dementia [3].

For average time spent in each stage, findings from Tariot et al. (2024) were used to decide due to the strength of the data [7]. The mean age of participants in that study was 72, and the mean age of simulated individuals in our model was 85. Considering this, we used 4 years as the time in state for the severe stage, supported by empirical evidence that median survival time after a dementia diagnosis in the UK is approximately 10 years [8]. We decided on not including severe mortality multipliers due to the strong mortality effects already present in our model. Background mortality was multiplied by a constant scalar of 0.46 each year between 2023 to 2040. This is a level adjustment. Each year’s age/sex hazard is multiplied once by 0.46 which preserves the age/sex shape while lowering overall mortality to match the ONS projections.

**Table 1.B** Time in each dementia stage and associated mortality multipliers

| Stage                        | Onset | Mild | Moderate | Severe |
|------------------------------|-------|------|----------|--------|
| <b>Time in state (years)</b> | –     | 2.2  | 2.0      | 4.0    |

We derived annual living-setting transition probabilities from an Office of Health Economics 2023 [9] report that reported home and institution proportions for adults aged 65+ by dementia severity stage. In the model, transitions are implemented as movement from home to institution. Institutional care is treated as an absorbing state, reflecting progression of dementia and no modelled return to home.

**Table 1.C** Living setting transition probabilities

| Dementia Severity Stage | To institution |
|-------------------------|----------------|
| Mild                    | 0.066          |
| Moderate                | 0.143          |
| Severe                  | 0.179          |

## 2 Background Mortality Configuration

Annual absolute hazards by age had to be calculated to provide individuals in the model with a sex-and age-specific hazards that represent the general population risk of death.

Using ONS life tables data, the annual probability of death for 2023 for each age and sex were converted to a hazard [14]:

$$h_i = -\ln(1 - \text{prob}) \quad (1)$$

The calculated base hazard (see Appendix Table 1) is later scaled by the dementia and risk multipliers so individuals in more advanced disease stages have a higher all-cause mortality than the population baseline.

### 3 Parametric Proportional Hazards Age Effects On Dementia Stage

For the age effects, the per year log-hazard  $\beta$ 's had to be chosen based on the available literature. Similar non-linear methods are used to estimate dementia incidence and prevalence in an English population [15,16]. Alzheimer's UK estimates that after age 65, the risk of developing dementia doubles every 5 years, which implies a HR = 2.0 for a 5-year age difference. This would make the corresponding onset  $\beta$ :

$$\beta = \frac{\ln(2.0)}{5} = 0.1386 \quad (2)$$

We can set our reference age  $a_{\text{ref}} = 65$  which reduces the correlation between  $\beta_k$  and the baseline hazard during calibration.

$$\text{At age 70 vs 65: } e^{0.1386(70-65)} \approx 2.0 \quad (3)$$

$$\text{At age 75 vs 65: } e^{0.1386(75-65)} \approx 4.0 \quad (4)$$

This is a 2 fold increase over the 5 year difference, which is reasonable given the natural disease progression at age 70 compared to age 65. However, this combined with risk factor and baseline onset effects would result in excessive onset compounding in the model. Other  $\beta$ s were tested for calibration with empirical incidence data. Therefore, we calibrated to get ~90,000 incident dementia cases in 2024 after an initial hard code of 80,000 in 2023. This was based on primary care recording data [37]. The result was an onset  $\beta = 0.05$  because other model components capture additional risk.

### 4 Costs Associated With Dementia Care

The Economic Impact Of Dementia CF Report 2024 provided us with all the relevant cost data associated with the different stages of dementia [2]. We deflated the costs to 2023

using the UK government GDP deflator tool [33]. Costs were split by dementia stage, then by location of care. A further split of professional or informal care was made to assign who those costs were accrued by. The professional costs were composed of social care and healthcare costs, while informal where composed of unpaid care and quality of life costs. As we are estimating the costs of dementia, we held costs for cognitively normal individuals at zero.

**Table 4.A** Costs of dementia care per individual (£)

|                           |                    | <b>Professional<br/>(Social care +<br/>healthcare)</b> | <b>Informal<br/>(Unpaid care +<br/>quality of life costs)</b> | <b>Total</b> |
|---------------------------|--------------------|--------------------------------------------------------|---------------------------------------------------------------|--------------|
| <b>Cognitively Normal</b> | <b>Home</b>        | 0                                                      | 0                                                             | 0            |
|                           | <b>Institution</b> | 0                                                      | 0                                                             | 0            |
| <b>Mild</b>               | <b>Home</b>        | 7,466.70                                               | 10,189.55                                                     | 17,656.25    |
|                           | <b>Institution</b> | 23,144.27                                              | 874.93                                                        | 24,019.19    |
| <b>Moderate</b>           | <b>Home</b>        | 7,180.18                                               | 33,726.09                                                     | 40,906.28    |
|                           | <b>Institution</b> | 15,552.58                                              | 1,643.14                                                      | 17,195.71    |
| <b>Severe</b>             | <b>Home</b>        | 7,668.60                                               | 31,523.39                                                     | 39,191.99    |
|                           | <b>Institution</b> | 53,084.13                                              | 501.88                                                        | 53,586.01    |

**Table 4.B** Breakdown of costs by categories [2]

| <b>Healthcare</b>       | <b>Social care</b> | <b>Unpaid care</b> | <b>Quality of life costs</b> |
|-------------------------|--------------------|--------------------|------------------------------|
| Primary care activity   | Residential care   | Unpaid carers      | Transport costs              |
| Secondary care activity | Nursing care       |                    | Legal and financial          |
| Community care          | Domiciliary care   |                    | Energy costs                 |
| Mental health services  | Caregiver          |                    | Criminal justice             |
| Prescriptions           |                    |                    | Scams                        |

## 5 QALYs Associated With Dementia Care

QALY utility values (from EQ-5D sources) for each dementia stage were taken directly from a previous modelling study [34]. These were reported to be the same for males and females. Age specific and sex specific QALY utility values for the cognitively normal population were taken from University of York EQ-5D value set, commonly used in health economic evaluations [35].

Due to the impact of dementia on informal caregivers, we also used specific values for these informal caregivers by dementia stage. These were obtained from a single study due to an absence of research on caregivers, and will be ineffective at capturing the true

**Table 6.A** QALY utility values for dementia patients by severity stage

| Stage               | Mild | Moderate | Severe |
|---------------------|------|----------|--------|
| QALY utility values | 0.71 | 0.64     | 0.38   |

effects of caregiving on caregivers due to their primary role of capturing physical health [34].

**Table 6.B** QALY utility values for informal caregivers by severity stage

| Stage               | Mild | Moderate | Severe |
|---------------------|------|----------|--------|
| QALY utility values | 0.86 | 0.85     | 0.82   |

## 6 External Validation Calibration

We simulated our model from its base year 2023 to 2024 ensure population structure accuracy, and to 2024 and 2025 for dementia prevalence accuracy. The model was calibrated using observed prevalence and population for England [3,4]. We used regression-based calibration to compare our model predictions by regressing the observed values on model-predicted values across age and sex strata.

$$\text{Observed}_i = \alpha + \beta (\text{Predicted}_i) + \varepsilon_i \quad (5)$$

**Equation 6.A** Simple linear regression for calibration

Perfect calibration would result in  $\alpha \approx 0$ ,  $\beta \approx 1$ , and a  $R^2$  close to 1. If our parametric age and risk factor effects are correctly specified and calibrated, they should mirror the true age pattern of onset and population change.

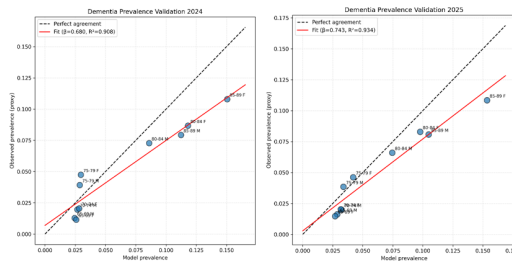

**Figure 6.A** External validation for prevalence for 2024 and 2025

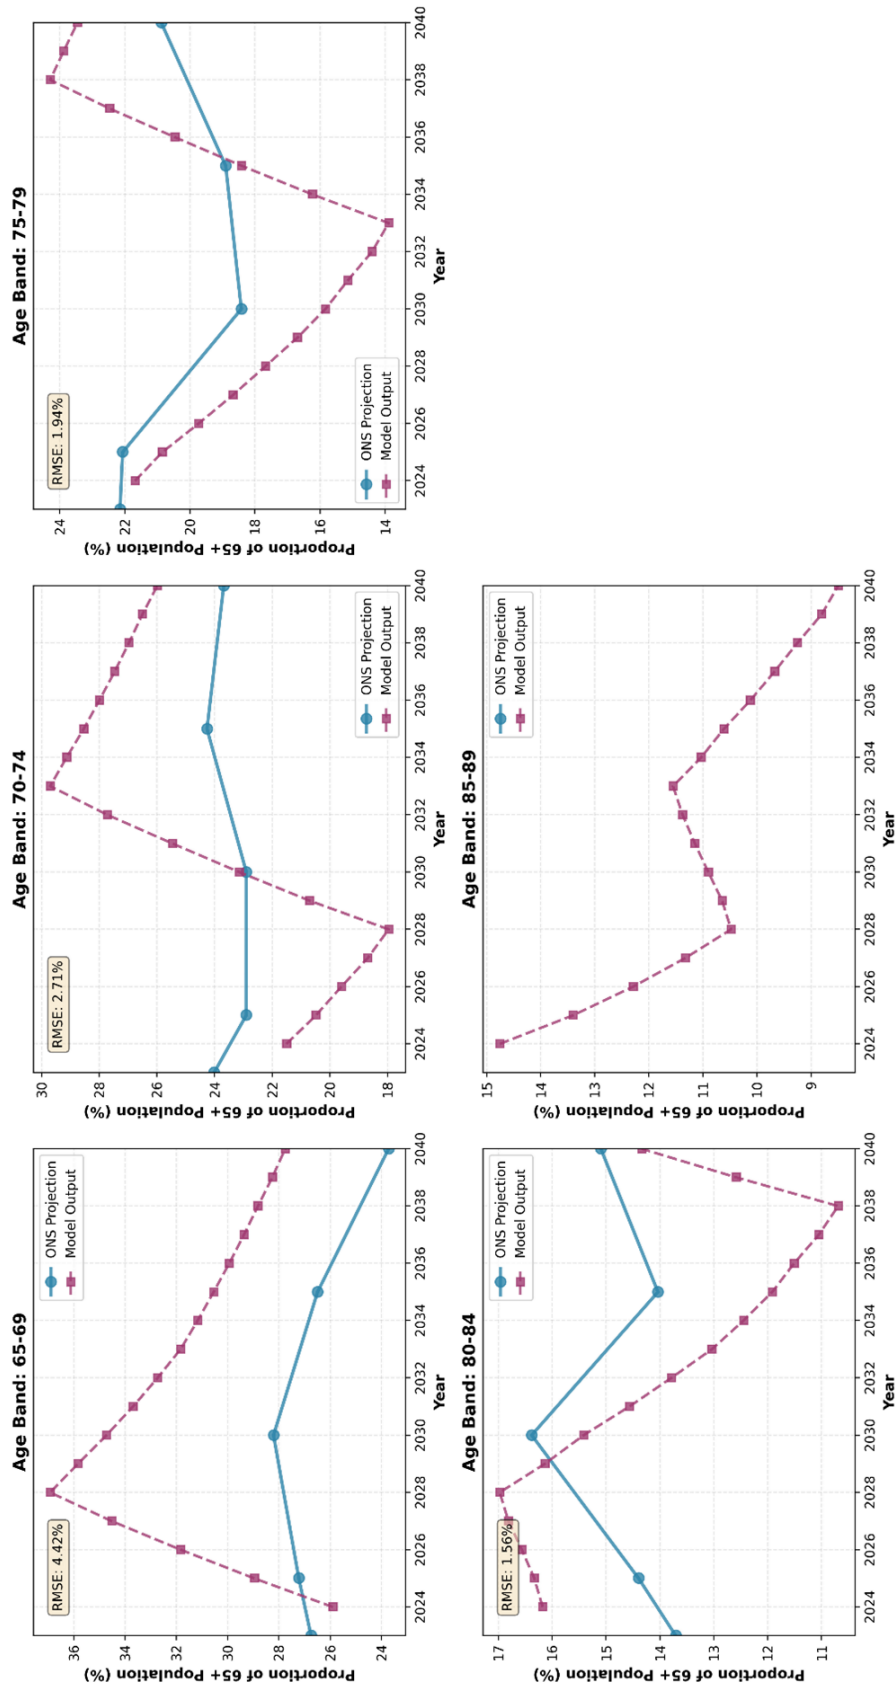

**Figure 6.B** External validation for population age structure. Note: RMSE = root mean squared error was calculated as the difference between our predicted model results and ONS predicted values

## 7 Probabilistic Sensitivity Analysis

Table 7.A provides all the values, distributions and relative standard deviations of all the variables that are tested under probabilistic sensitivity analysis.

**Table 7.A** Model Dementia Onset and Disease Prevalence Probabilistic Sensitivity. \* = Approximate values calculated from mean and 10% relative SD.

| Parameter                     | Base Value     | Distribution | Relative SD | Alpha*           | Beta*              |
|-------------------------------|----------------|--------------|-------------|------------------|--------------------|
| Base onset probability        | 0.05           | Beta         | 10%         | N/A              | N/A                |
| <i>Risk Factor Prevalence</i> |                |              |             |                  |                    |
| Periodontal disease           | 0.75/0.50/0.25 |              |             | 74.75/49.5/24.25 | 224.25/49.5/8.0833 |
| Hearing difficulty            | 36%            | Beta         | 10%         | 63.640           | 113.138            |
| Hypertension                  | 45.2           |              |             | 54.348           | 65.891             |
| Obesity                       | 24.3%          |              |             | 75.457           | 235.066            |
| Depression                    | 6.8%           |              |             | 93.132           | 1276.456           |
| Type 2 Diabetes               | 4.5%           |              |             | 95.455           | 2025.767           |
| APOE $\epsilon 4$ carrier     | 25.6%          |              |             | 74.144           | 215.481            |

**Table 7.B** Probabilistic Sensitivity Analysis Values For Risk Factor Hazard Ratios

| Risk Factor         | Base Value | Lower 95% CI | Upper 95% CI | Distribution |
|---------------------|------------|--------------|--------------|--------------|
| Periodontal disease | 1.21       | 1.07         | 1.38         | Lognormal    |
| Hearing difficulty  | 1.21       | 1.15         | 1.27         |              |
| Hypertension        | 1.36       | 1.28         | 1.45         |              |
| Obesity             | 1.1        | 1.03         | 1.18         |              |
| Depression          | 1.93       | 1.74         | 2.13         |              |
| Type 2 Diabetes     | 2.06       | 1.92         | 2.22         |              |

| Risk Factor               | Base Value | Lower 95% CI | Upper 95% CI | Distribution |
|---------------------------|------------|--------------|--------------|--------------|
| APOE $\epsilon$ 4 carrier | 3.02       | 2.88         | 3.19         |              |

**Table 7.C** Probabilistic Sensitivity Analysis Values For Costs

| Stage       | Setting     | Provider/Payer | Base Value | Distribution | Relative SD | Shape | Scale  |
|-------------|-------------|----------------|------------|--------------|-------------|-------|--------|
| Cog. normal | Home        | Professional   | 0          |              |             |       |        |
|             |             | Informal       | 0          |              |             |       | 0      |
|             | Institution | Professional   | 0          |              |             |       |        |
|             |             | Informal       | 0          |              |             |       |        |
| Mild        | Home        | Professional   | 7,466.70   |              |             |       | 74.67  |
|             |             | Informal       | 10,189.55  |              |             |       | 101.90 |
|             | Institution | Professional   | 23,144.27  |              |             |       | 231.44 |
|             |             | Informal       | 874.93     | Gamma        | 10%         | 100   | 8.75   |
| Moderate    | Home        | Professional   | 7,180.18   |              |             |       | 71.80  |
|             |             | Informal       | 33,726.09  |              |             |       | 337.26 |
|             | Institution | Professional   | 15,552.58  |              |             |       | 155.53 |
|             |             | Informal       | 1,643.14   |              |             |       | 16.43  |
| Severe      | Home        | Professional   | 7,668.60   |              |             |       | 76.69  |
|             |             | Informal       | 31,523.39  |              |             |       | 315.23 |
|             | Institution | Professional   | 53,084.13  |              |             |       | 530.84 |
|             |             | Informal       | 501.88     |              |             |       | 5.02   |

**Table 7.D** Probabilistic Sensitivity Analysis Values For Utility Weights

| Parameter Category          | Stage/Age   | Setting/Sex | Base Value | Distribution | Relative SD |
|-----------------------------|-------------|-------------|------------|--------------|-------------|
| Patient utility multipliers | Cog. normal | Home        | 1.0        |              |             |
|                             |             | Institution | N/A        |              |             |
|                             | Mild        | Home        | 0.85       |              |             |
|                             |             | Institution | 0.80       |              |             |
|                             | Moderate    | Home        | 0.70       |              |             |
|                             |             | Institution | 0.65       |              |             |

| Parameter Category      | Stage/Age   | Setting/Sex | Base Value | Distribution | Relative SD |  |
|-------------------------|-------------|-------------|------------|--------------|-------------|--|
| Caregiver utility mult. | Severe      | Home        | 0.50       |              |             |  |
|                         |             | Institution | 0.45       |              |             |  |
|                         | Cog. normal | N/A         |            | N/A          |             |  |
|                         |             |             |            |              |             |  |
|                         | Mild        | Home        |            | 0.86         |             |  |
|                         |             |             |            | 0.85         |             |  |
|                         | Moderate    | Home        |            | 0.82         |             |  |
|                         |             |             |            | 0.71         |             |  |
|                         | Severe      | Home        |            | 0.64         |             |  |
|                         |             |             |            | 0.38         |             |  |
| Dementia stage QALYs    | Male        | N/A         |            | 0.78         |             |  |
|                         |             |             |            |              |             |  |
|                         | Age 65      | Female      |            | 0.71         |             |  |
|                         |             |             |            |              |             |  |
|                         | Age 75+     | Male        | Age        |              | 0.78        |  |
|                         |             |             |            |              |             |  |
|                         |             |             |            |              |             |  |

## 8 Probabilistic Sensitivity Analysis Results

Table 8.A Full results of PSA runs

| Scenario            | Mean             | Lower 95% CI     | Upper 95% CI     | CV (%) |
|---------------------|------------------|------------------|------------------|--------|
| <b>Total Costs</b>  |                  |                  |                  |        |
| 50% Prevalence      | £586,245,547,083 | £487,424,144,246 | £683,456,725,900 | 8.58   |
| Growth Scenario     | £586,816,135,677 | £486,128,245,547 | £681,588,948,867 | 8.52   |
| <b>Formal Costs</b> |                  |                  |                  |        |
| 50% Prevalence      | £331,722,151,094 | £270,277,372,016 | £398,030,654,871 | 9.95   |
| Growth Scenario     | £331,994,910,678 | £268,442,641,460 | £399,036,048,851 | 9.95   |

| Scenario                       | Mean             | Lower 95% CI     | Upper 95% CI     | CV (%) |
|--------------------------------|------------------|------------------|------------------|--------|
| <b>Informal Costs</b>          |                  |                  |                  |        |
| <b>50% Prevalence</b>          | £254,523,395,989 | £208,525,623,807 | £298,149,312,849 | 9.20   |
| <b>Growth Scenario</b>         | £254,821,224,999 | £207,371,136,723 | £299,042,362,133 | 9.09   |
| <b>Cohort Population QALYs</b> |                  |                  |                  |        |
| <b>50% Prevalence</b>          | 163,430,925      | 145,448,065      | 177,658,398      | 5.67   |
| <b>Growth Scenario</b>         | 163,426,540      | 145,457,465      | 177,659,381      | 4.93   |
| <b>Caregiver QALYs</b>         |                  |                  |                  |        |
| <b>50% Prevalence</b>          | 9,526,497        | 7,716,956        | 11,359,514       | 10.15  |
| <b>Growth Scenario</b>         | 9,539,665        | 7,725,917        | 11,458,260       | 10.01  |
| <b>Incident Dementia Cases</b> |                  |                  |                  |        |
| <b>50% Prevalence</b>          | 2,364,002        | 1,911,623        | 2,801,095        | 9.33   |
| <b>Growth Scenario</b>         | 2,369,028        | 1,914,453        | 2,803,283        | 9.51   |

## 9 One-way sensitivity analysis results

**Table 9.A** Full one-way sensitivity results

|                      | 50% Prevalence |              |          | Growth Scenario |              |          |
|----------------------|----------------|--------------|----------|-----------------|--------------|----------|
|                      | High onset HR  | Low onset HR | Baseline | High onset HR   | Low onset HR | Baseline |
| Total formal cost    | £325.1bn       | £296.8bn     | £330.5bn | £325.5bn        | £297.2bn     | £330.5bn |
| Total informal costs | £252.3bn       | £230.2bn     | £253.8bn | £252.7bn        | £230.5bn     | £253.8bn |
| Total costs          | £577.4bn       | £527.1bn     | £584.2bn | £578.2bn        | £527.7bn     | £584.3bn |

|              |             |             |             |             |             |
|--------------|-------------|-------------|-------------|-------------|-------------|
| Total cohort | 159,836,295 | 160,326,705 | 160,295,583 | 159,822,849 | 160,282,214 |
| QALYs        |             |             |             |             |             |
| Total        | 9,483,038   | 8,490,437   | 8,600,057   | 9,498,173   | 8,607,060   |
| caregiver    |             |             |             |             |             |
| QALYs        |             |             |             |             |             |
| Total        | 169,319,334 | 168,817,142 | 168,895,641 | 169,321,022 | 168,889,274 |
| QALYs        |             |             |             |             |             |
| Cumulative   | 2,490,613   | 2,183,398   | 2,218,198   | 2,499,733   | 2,219,885   |
| incident     |             |             |             |             |             |
| onsets       |             |             |             |             |             |

---

## References

1. Brück CC, Wolters FJ, Ikram MA, de Kok IMCM. Projections of costs and quality-adjusted life years lost due to dementia from 2020 to 2050: a population-based microsimulation study. *Alzheimers Dement.* 2023;19(10):4532–4541. doi:10.1002/alz.13019.
2. Alzheimer’s Society. *The economic impact of dementia – Module 1: Annual costs of dementia.* London: Alzheimer’s Society; 2024 May [cited 2025 Oct 24]. Available from: <https://www.alzheimers.org.uk/sites/default/files/2024-05/the-annual-costs-pdf>
3. NHS Digital. Primary Care Dementia Data, December 2023. England: NHS Digital; 2024. Available from: <https://digital.nhs.uk/data-and-information/publications/statistical/primary-care-dementia-data/december-2023>
4. Office for National Statistics. Estimates of the population for England and Wales [Internet]. 2023. Available from: <https://www.ons.gov.uk/peoplepopulationandcommunity/populationandmigration/populationestimates/datasets/estimatesofthepopulationforen>
5. Ahmadi-Abhari S, Guzman-Castillo M, Bandosz P, Shipley MJ, Muniz-Terrera G, Singh-Manoux A, Kivimäki M, Steptoe A, Capewell S, O’Flaherty M, Brunner EJ. Temporal trend in dementia incidence since 2002 and projections for prevalence in England and Wales to 2040: modelling study. *BMJ.* 2017 Jul 5;358.
6. Pham TM, Petersen I, Walters K, Raine R, Manthorpe J, Mukadam N, Cooper C. Trends in dementia diagnosis rates in UK ethnic groups: analysis of UK primary care data. *Clinical Epidemiology.* 2018 Aug 8:949–60.
7. Tariot PN, Boada M, Lanctôt KL, et al. Relationships of change in Clinical Dementia Rating (CDR) on patient outcomes and probability of progression: observational

- analysis. *Alzheimers Res Ther.* 2024;16:36. doi:10.1186/s13195-024-01399-7
8. Luo H, Koponen M, Roethlein C, Becker C, Bell JS, Beyene K, Chai Y, Chan AH, Chui CS, Haenisch B, Hartikainen S. A multinational cohort study of trends in survival following dementia diagnosis. *Commun Med.* 2025 May 28;5(1):203.
  9. Besley S, Kourouklis D, O'Neill P, Garau M. Dementia in the UK: estimating the potential future impact and return on research investment. London: Office of Health Economics; 2023. Available from: <https://www.ohe.org/publications>. (Accessed 1 Dec 2025).
  10. Crowell V, Reyes A, Zhou SQ, et al. Disease severity and mortality in Alzheimer's disease: an analysis using the U.S. National Alzheimer's Coordinating Center Uniform Data Set. *BMC Neurol.* 2023;23:302. doi:10.1186/s12883-023-03353-w
  11. Villarejo A, Benito-León J, Trincado R, Posada IJ, Puertas-Martín V, Boix R, Medrano MJ, Bermejo-Pareja F. Dementia-associated mortality at thirteen years in the NEDICES cohort study. *J Alzheimers Dis.* 2011;26(3):543–551.
  12. Andersen K, Lolk A, Martinussen T, Kragh-Sørensen P. Very mild to severe dementia and mortality: a 14-year follow-up—the Odense study. *Dement Geriatr Cogn Disord.* 2010;29(1):61–67. doi:10.1159/000264637
  13. Kuryba AJ, Boyle JM, van der Meulen J, Aggarwal A, Walker K, Fearnhead NS, Braun MS. Severity of dementia and survival in patients diagnosed with colorectal cancer: a national cohort study in England and Wales. *Clin Oncol (R Coll Radiol).* 2023;35:e67–e76. doi:10.1016/j.clon.2023.04.013
  14. Office for National Statistics. *National life tables: UK* [Internet]. London: Office for National Statistics; 18 March 2025 [cited 2025 Oct 23]. Available from: <https://www.ons.gov.uk/peoplepopulationandcommunity/birthsdeathsandmarriages/lifeexpectancies/datasets/nationallifetablesunitedkingdomreferencetables>
  15. Chen Y, Bandosz P, Stoye G, Liu Y, Wu Y, Lobanov-Rostovsky S, et al. Dementia incidence trend in England and Wales, 2002–19, and projection for dementia burden to 2040: analysis of data from the English Longitudinal Study of Ageing. *Lancet Public Health.* 2023;8(11):e859–e867. doi:10.1016/S2468-2667(23)00187-2
  16. Satizabal CL, Beiser AS, Chouraki V, Chêne G, Dufouil C, Seshadri S. Incidence of dementia over three decades in the Framingham Heart Study. *N Engl J Med.* 2016;374(6):523–532. doi:10.1056/NEJMoa150432

17. Öksüz N, Ghouri R, Taşdelen B, Uludüz D, Özge A. Mild cognitive impairment progression and Alzheimer’s disease risk: a comprehensive analysis of 3553 cases over 203 months. *J Clin Med.* 2024;13(2):518. doi:10.3390/jcm13020518
18. Biondo F, Jewell A, Pritchard M, et al. Brain-age is associated with progression to dementia in memory clinic patients. *Neuroimage Clin.* 2022;36:103175. doi:10.1016/j.nicl.2022.103175
19. Geraets AFJ, Leist AK. Sex/gender and socioeconomic differences in modifiable risk factors for dementia. *Sci Rep.* 2023;13(1):80. doi:10.1038/s41598-022-27368-4.
20. Dong C, Zhou C, Fu C, et al. Sex differences in the association between cardiovascular diseases and dementia subtypes: a prospective analysis of 464,616 UK Biobank participants. *Biol Sex Differ.* 2022;13:21. doi:10.1186/s13293-022-00431-5
21. Gong J, Harris K, Peters SAE, et al. Sex differences in the association between major cardiovascular risk factors in midlife and dementia: a cohort study using data from the UK Biobank. *BMC Med.* 2021;19:110. doi:10.1186/s12916-021-01980-z
22. Asher S, Stephen R, Mäntylä P, Suominen AL, Solomon A. Periodontal health, cognitive decline, and dementia: a systematic review and meta-analysis of longitudinal studies. *J Am Geriatr Soc.* 2022 Sep;70(9):2695–709.
23. Batty GD, Russ TC, Starr JM, et al. Modifiable cardiovascular disease risk factors as predictors of dementia death: pooling of ten general population-based cohort studies. *J Negat Results Biomed.* 2014;13:8. doi:10.1186/1477-5751-13-8
24. Kim JH, Lee Y. Dementia and death after stroke in older adults during a 10-year follow-up: results from a competing risk model. *J Nutr Health Aging.* 2018;22(2):297–301. doi:10.1007/s12603-017-0914-3
25. Luo J, Rasmussen IJ, Nordestgaard BG, Tybjaerg-Hansen A, Thomassen JQ, Frikke-Schmidt R. Cardiovascular diseases and risk of dementia in the general population. *Eur J Prev Cardiol.* 2025;zwaf129. doi:10.1093/eurjpc/zwaf129
26. Russ TC, Hamer M, Stamatakis E, Starr JM, Batty GD, Kivimäki M. Does the Framingham cardiovascular disease risk score also have predictive utility for dementia death? An individual participant meta-analysis of 11,887 men and women. *Atherosclerosis.* 2013;228(1):256–258. doi:10.1016/j.atherosclerosis.2013.02.025
27. Zhang J, Huang X, Ling Y, et al. Associations of cardiometabolic multimorbidity with all-cause dementia, Alzheimer’s disease, and vascular dementia: a cohort study in the UK Biobank. *BMC Public Health.* 2025;25:2397. doi:10.1186/s12889-025-23352-5

28. Beydoun MA, Beydoun HA, Hossain S, El-Hajj ZW, Weiss J, Zonderman AB. Clinical and bacterial markers of periodontitis and their association with incident all-cause and Alzheimer’s disease dementia in a large national survey. *J Alzheimers Dis.* 2020;75(1):157–172. doi:10.3233/JAD-200064.
29. Office for National Statistics. *Adult smoking habits in Great Britain: 2023* [Internet]. London: ONS; 2024 Oct 1 [cited 2025 Dec 1]. Available from: <https://www.ons.gov.uk/peoplepopulationandcommunity/healthandsocialcare/healthandlifeexpectancies/bulletins/adultsmokinghabitsingreatbritain/2023>
30. British Heart Foundation. *BHF Cardiovascular Disease Statistics Compendium 2023* [Internet]. London: British Heart Foundation; 2023 [cited 2025 Dec 1]. Available from: <https://www.bhf.org.uk/-/media/files/for-professionals/research/heart-statistics/bhf-statistics-compedium-2023>
31. British Heart Foundation. *BHF Cardiovascular Disease Statistics Compendium 2023* [Internet]. London: British Heart Foundation; 2023 [cited 2025 Dec 1]. Available from: <https://www.bhf.org.uk/-/media/files/for-professionals/research/heart-statistics/bhf-statistics-compedium-2023>
32. Department of Health & Social Care. *Diabetes profile – Fingertips data* [Internet]. London: Department of Health & Social Care; [date unknown]. Available from: <https://fingertips.phe.org.uk/profile/diabetes-ft/data> (Accessed December 1, 2025).
33. HM Treasury. *GDP deflators at market prices, and money GDP: March 2025 (Spring Statement & Quarterly National Accounts)* [Internet]. London: HM Treasury; 2025 Mar [cited 2025 Oct 24]. Available from: <https://www.gov.uk/government/statistics/gdp-deflators-at-market-prices-and-money-gdp-march-2025-spring-statement>
34. Mukadam N, Anderson R, Walsh S, Wittenberg R, Knapp M, Brayne C, Livingston G. Benefits of population-level interventions for dementia risk factors: an economic modelling study for England. *Lancet Healthy Longev.* 2024;5(9):e567–e577. doi:10.1016/S2666-7568(24)00156-3
35. Kind P, Hardman G, Macran S. *UK population norms for EQ-5D*. York: Centre for Health Economics, University of York; 1999 Nov. Report No.: 172.
36. Reed C, Barrett A, Lebec J, et al. How useful is the EQ-5D in assessing the impact of caring for people with Alzheimer’s disease? *Health Qual Life Outcomes.* 2017;15:16. doi:10.1186/s12955-017-0591-2

37. Department of Health & Social Care. *Dementia New Indicators Factsheet Part 1: April 2023 to December 2023*. NHS England; 2023. Available from [https://fingertips.phe.org.uk/documents/Dementia\\_New\\_Indicator\\_Factsheet\\_Part1.html](https://fingertips.phe.org.uk/documents/Dementia_New_Indicator_Factsheet_Part1.html) (Accessed December 1, 2025).

# Appendix

**Table 1** Background mortality probabilities by age and sex

| <b>Age</b> | <b>Male</b> | <b>Female</b> |
|------------|-------------|---------------|
| 65         | 0.012624353 | 0.008298336   |
| 66         | 0.013983312 | 0.009275888   |
| 67         | 0.015533015 | 0.010128117   |
| 68         | 0.017026125 | 0.011140829   |
| 69         | 0.018353398 | 0.012055375   |
| 70         | 0.020152709 | 0.013366941   |
| 71         | 0.022175059 | 0.014398158   |
| 72         | 0.024319332 | 0.015880429   |
| 73         | 0.026198195 | 0.017527717   |
| 74         | 0.028447830 | 0.019302093   |
| 75         | 0.031740440 | 0.021814209   |
| 76         | 0.035692465 | 0.024221998   |
| 77         | 0.039667453 | 0.027727889   |
| 78         | 0.044963894 | 0.031303894   |
| 79         | 0.049874302 | 0.035050142   |
| 80         | 0.057289128 | 0.040569943   |
| 81         | 0.064013859 | 0.045992631   |
| 82         | 0.072640588 | 0.052261131   |
| 83         | 0.079863890 | 0.058631734   |
| 84         | 0.089929084 | 0.066224208   |
| 85         | 0.100945830 | 0.075113709   |
| 86         | 0.113810561 | 0.086476611   |
| 87         | 0.128789510 | 0.097566523   |
| 88         | 0.146388550 | 0.112847361   |
| 89         | 0.164157919 | 0.127565226   |
| 90         | 0.187110606 | 0.146074877   |
| 91         | 0.207099203 | 0.166562387   |
| 92         | 0.235637527 | 0.190102953   |
| 93         | 0.260684476 | 0.213685916   |
| 94         | 0.291674030 | 0.237158808   |
| 95         | 0.323528963 | 0.265026004   |
| 96         | 0.353340509 | 0.291911002   |
| 97         | 0.397973242 | 0.327432419   |

---

| <b>Age</b> | <b>Male</b> | <b>Female</b> |
|------------|-------------|---------------|
| 98         | 0.414895939 | 0.364047771   |
| 99         | 0.475423088 | 0.393586440   |
| 100        | 0.514090949 | 0.438461552   |

---
